# Supplementary material for: Simplified Method for the Determination of Total Kjeldahl Nitrogen in Wastewater
Source: MDPI journal article supplement (doi:10.3390/environments9050055), 2022-04-28
Supplement: s1 [file s1]

Table S1: TKN concentrations from Nicotinic acid-PTSA measured using s-TKN™ and standard methods.

| Theoretical TKN<br>(ppm) | s-TKN method<br>(ppm) | Standard method<br>(ppm) |
|--------------------------|-----------------------|--------------------------|
| 2                        | 1.98                  | 1.972                    |
| 4                        | 3.93                  | 3.721                    |
| 8                        | 7.77                  | 7.713                    |
| 10                       | 9.67                  | 9.467                    |
| 12                       | 11.80                 | 11.443                   |

Table S2: TKN concentrations from Ammonium-PTSA measured using s-TKN™ method.

| Theoretical TKN<br>(ppm) | s-TKN method<br>(ppm) |
|--------------------------|-----------------------|
| 2                        | 1.95                  |
| 4                        | 3.80                  |
| 8                        | 7.62                  |
| 10                       | 10.10                 |
| 12                       | 11.80                 |
| 14                       | 13.80                 |
| 16                       | 15.60                 |

Table S3: TKN concentrations from Urea measured using s-TKN™ and standard method.

| Theoretical TKN<br>(ppm) | s-TKN method<br>(ppm) | Standard method<br>(ppm) |
|--------------------------|-----------------------|--------------------------|
| 2                        | 2.09                  | 1.901                    |
| 4                        | 4.19                  | 4.042                    |
| 8                        | 8.19                  | 7.959                    |
| 10                       | 10.25                 | 10.628                   |
| 12                       | 11.80                 | 12.268                   |
| 14                       | 14.75                 | 14.699                   |
| 16                       | 16.5                  | 15.687                   |

Table S4: TKN concentrations from mixed standard - Glycine- PTSA and nitrate measured using s-TKN™ and standard method.

| Theoretical<br>nitrate<br>(ppm) | Theoretical TKN<br>(ppm) | Theoretical TN<br>(ppm) | standard method<br>(TKN concentration) | s-TKN method<br>(TKN concentration) |
|---------------------------------|--------------------------|-------------------------|----------------------------------------|-------------------------------------|
| 8                               | 0                        | 8                       | NA                                     | NA                                  |
| 0                               | 8                        | 8                       | 8.51                                   | 8.11                                |
| 8                               | 8                        | 16                      | 8.62                                   | 7.56                                |
| 6                               | 6                        | 12                      | 6.09                                   | 5.87                                |
| 4                               | 4                        | 8                       | 4.18                                   | 4.02                                |
| 2                               | 6                        | 8                       | 6.78                                   | 5.98                                |
| 6                               | 2                        | 8                       | 2.47                                   | 2.01                                |
| 2                               | 2                        | 4                       | 2.12                                   | 1.93                                |

Table S5: TKN concentrations for real world matrices using s-TKN™ and standard method (EPA 351.2).

| Sample ID       | Measured TKN (ppm)<br>(s-TKN method) | Measured TKN (ppm)<br>(Standard method) |
|-----------------|--------------------------------------|-----------------------------------------|
| Estuarine water | 0.08                                 | 0.401                                   |
| Estuarine water | 0.39                                 | 0.334                                   |
| Estuarine water | 0.77                                 | 0.808                                   |
| Estuarine water | 1.14                                 | 0.412                                   |
| Estuarine water | 0.34                                 | 0.419                                   |
| Estuarine water | 0.44                                 | 0.445                                   |
| Lake water      | 0.52                                 | 0.466                                   |
| Lake water      | 0.55                                 | 0.542                                   |
| Lake water      | 0.54                                 | 0.421                                   |
| Lake water      | 0.85                                 | 0.521                                   |
| Wastewater      | 2.46                                 | 2.517                                   |
| Wastewater      | 4.31                                 | 4.766                                   |
| Wastewater      | 15.7                                 | 15.083                                  |
| Wastewater      | 14.5                                 | 14.992                                  |
| Wastewater      | 12.6                                 | 12.69                                   |
| Wastewater      | 9.83                                 | 10.584                                  |
| Wastewater      | 7.55                                 | 7.68                                    |
| Wastewater      | 5.36                                 | 6.22                                    |
| Wastewater      | 4.23                                 | 3.979                                   |
| Wastewater      | 1.89                                 | 1.852                                   |
| Wastewater      | 29.15                                | 29.73                                   |
| Wastewater      | 26.4                                 | 25.6                                    |
| Wastewater      | 43.7                                 | 43.08                                   |
| Wastewater      | 45.3                                 | 48.61                                   |
| Wastewater      | 28.85                                | 31.1                                    |
| Wastewater      | 21.25                                | 23.5                                    |
| Wastewater      | 24.8                                 | 25.292                                  |
| Wastewater      | 30.0                                 | 31.14                                   |
| Wastewater      | 26.75                                | 24.85                                   |
| Wastewater      | 22.27                                | 23.69                                   |
| Wastewater      | 31.82                                | 30.91                                   |
| Wastewater      | 32.65                                | 31.82                                   |
| Wastewater      | 31.15                                | 30.185                                  |
| Wastewater      | 2.69                                 | 2.861                                   |
| Wastewater      | 14.9                                 | 14.938                                  |
| Wastewater      | 7.71                                 | 7.368                                   |
| Wastewater      | 3.64                                 | 3.932                                   |
| Wastewater      | 1.86                                 | 1.886                                   |
| Wastewater      | 31.6                                 | 37.81                                   |
| Estuarine water | 2.79                                 | 3.625                                   |
| Estuarine water | 6.23                                 | 5.06                                    |
| Estuarine water | 7.67                                 | 8.12                                    |
| Estuarine water | 10.4                                 | 9.932                                   |
| Estuarine water | 8.46                                 | 9.096                                   |
| Estuarine water | 3.38                                 | 2.844                                   |
